# Supplementary material
Source: MDPI journal article supplement (https://www.mdpi.com/2075-163X/11/11/1275)
Supplement: s1 [file s1]

# Dust characterization and its potential impact during the 2014-15 Fogo volcano eruption (Cape Verde)

Carla Candeias <sup>1\*</sup>, Paula F Ávila <sup>2</sup>, Célia Alves <sup>3</sup>, Carla Gama <sup>3</sup>, Cristina Sequeira <sup>1</sup>, Eduardo Ferreira da Silva <sup>1</sup> and Fernando Rocha <sup>1</sup>

<sup>1</sup>GeoBioTec Research Unit, University of Aveiro, Geosciences Department, Campus de Santiago, 3810-193 Aveiro, Portugal (\*candeias@ua.pt).

<sup>2</sup>LNEG National Laboratory of Energy and Geology. Rua da Amieira, Apartado 1089, 4466-901 S. Mamede de Infesta, Portugal.

<sup>3</sup>CESAM, University of Aveiro, Environment and Planning Department, Campus de Santiago, 3810-193 Aveiro, Portugal.

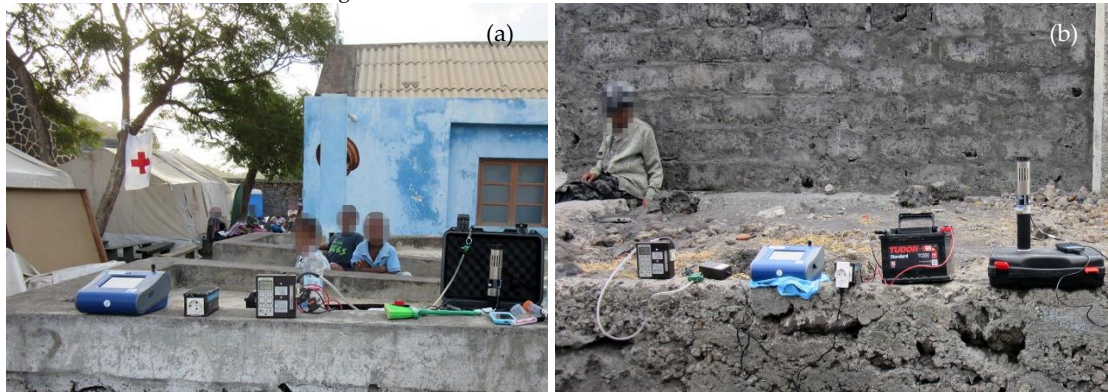

**Figure S1.** Fogo island sampling sites at (a) location with displaced population; and (b) human settlements.

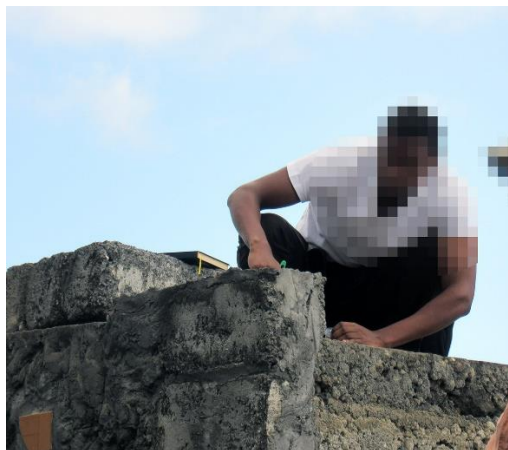

**Figure S2.** Rooftop dust collection, with new plastic broom and shovel.

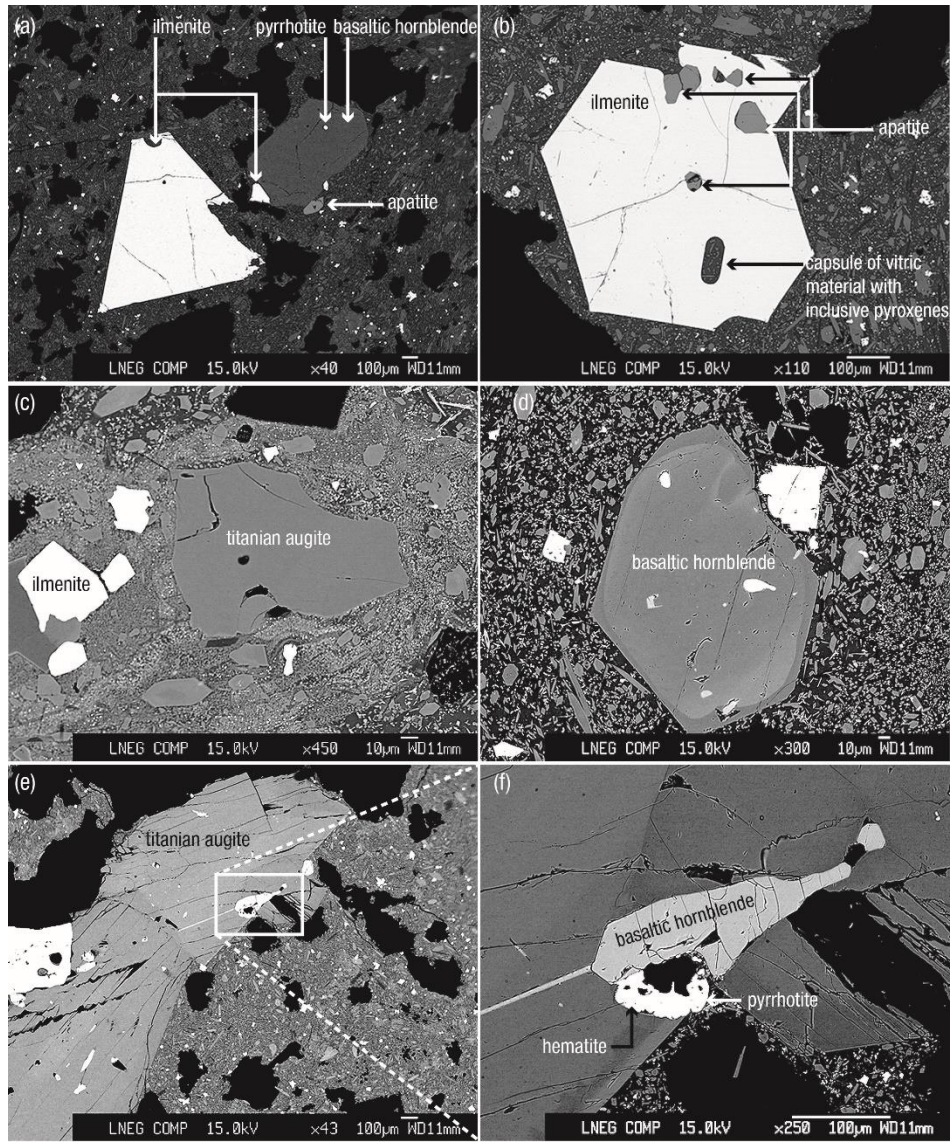

**Figure S3.** Backscattered electron imaging of Fogo 2014-15 eruption lava samples.

**Table S1.** Main mineral occurrence (DRX analysis) in the two lava samples and different dust size fractions [µm].

| Mineral                                                                                         | Lava | Rooftop dust |             |            |            |           |           |
|-------------------------------------------------------------------------------------------------|------|--------------|-------------|------------|------------|-----------|-----------|
|                                                                                                 |      | [1000, 2000[ | [500, 1000[ | [500, 250[ | [250, 125[ | [125, 63[ | [<63, 63[ |
| Quartz [SiO <sub>2</sub> ]                                                                      | +++  | +++++        | +++++       | ++++       | ++++       | +++       | +++       |
| Aegirine<br>[(Na,Ca)(Fe <sup>3+</sup> ,Fe <sup>2+</sup> ,Mg,Al)Si <sub>2</sub> O <sub>6</sub> ] | ++   | ++++         | +++++       | ++++       | ++         |           |           |
| Augite<br>[(Ca,Na)(Mg,Fe,Al,Ti) <sub>2</sub> (Si,Al) <sub>2</sub> O <sub>6</sub> ]              | ++   | +++++        | +++++       | +++++      | +++++      | +++++     | ++++      |
| Calcite [CaCO <sub>3</sub> ]                                                                    |      |              | +++         | ++         | +          | ++        | ++++      |
| Diopside [CaMgSi <sub>2</sub> O <sub>6</sub> ]                                                  | ++   | ++++         | ++++        | +++++      | +++++      | +++++     | +++++     |
| Fluorite [CaF <sub>2</sub> ]                                                                    | +    | ++++         | +++         | +++        | +++        | +         | ++        |
| Forsterite [Mg <sub>2</sub> SiO <sub>4</sub> ]                                                  |      | +++          | +++         | ++         | ++         | ++        | ++        |
| Hematite [Fe <sub>2</sub> O <sub>3</sub> ]                                                      | ++   | ++           | ++          | ++++       | ++++       | ++        | ++        |
| Ilmenite [Fe <sup>2+</sup> TiO <sub>3</sub> ]                                                   | ++   | +            | +++         | +++++      | ++++       | +++       | +++       |
| Leucite [KAlSi <sub>3</sub> O <sub>8</sub> ]                                                    | ++   | ++++         | +++++       | ++++       |            |           |           |
| Magnesioferrite [MgFe <sup>3+</sup> O <sub>4</sub> ]                                            | ++   |              |             | ++         | ++++       | ++++      | ++++      |

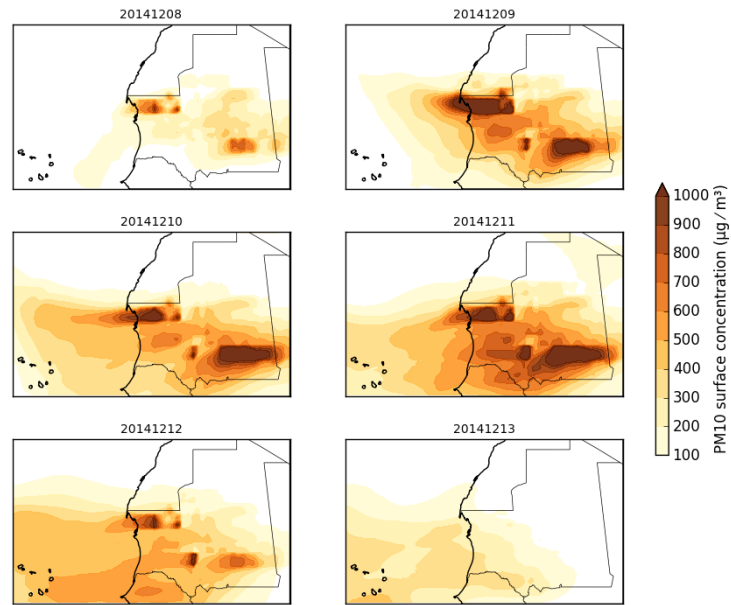

**Figure. S4** Daily evolution of the modeled mean PM<sub>10</sub> surface concentrations within the inner domain (CV<sub>d2</sub>) during a dust storm impacting air quality in Cape Verde (December 08 to 13, 2014).

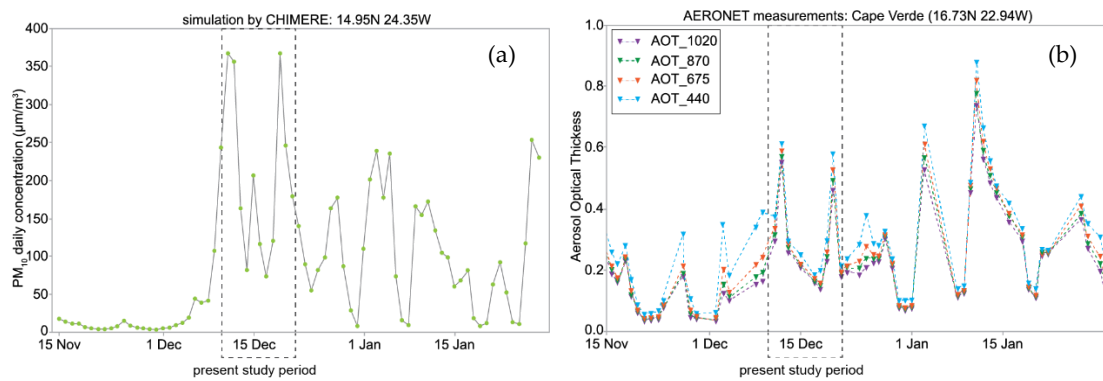

**Figure. S5.** (a) Modeled daily mean PM<sub>10</sub> concentrations in Fogo Island, Cape Verde, between 15 November 2014 and 31 January 2015 (simulation by CHIMERE: 14.95N 24.35W); and (b) Aerosol optical thickness (Level 2.0; daily averages) observed in the AERONET site installed in Sal Island, Cape Verde, between 15 November 2014 and 31 January 2015.

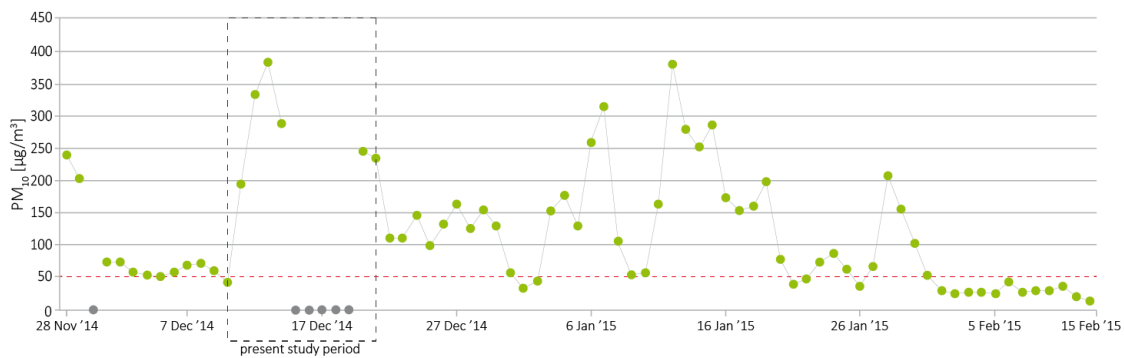

**Figure. S6.** Daily mean PM<sub>10</sub> concentrations in São Filipe, between November 28<sup>th</sup> 2014 and February 15<sup>th</sup> 2015 (courtesy of INMG - National Institute of Meteorology and Geophysics, Cape Verde). The red dashed line represents the daily mean 50 µg/m<sup>3</sup> guideline proposed by WHO (2006). Days without readings are in grey dots.

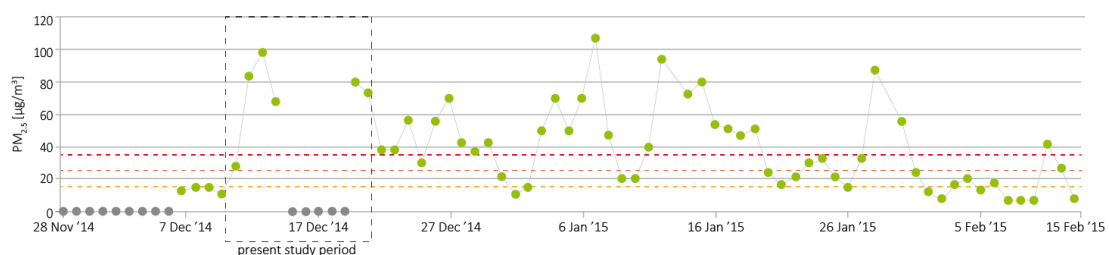

**Figure S7.** Daily mean PM<sub>2.5</sub> concentrations in São Filipe for the eruption time-lapse, between December 7<sup>th</sup> 2014 and February 15<sup>th</sup> 2015 (courtesy of INMG - National Institute of Meteorology and Geophysics, Cape Verde). Dashed lines represent the daily mean 25 (AQGPM<sub>2.5</sub>), 15 (IT-3), 25 (IT-2) and 35 (IT-1) µg/m<sup>3</sup> guidelines proposed by WHO (2006). Days without readings are in grey dots.



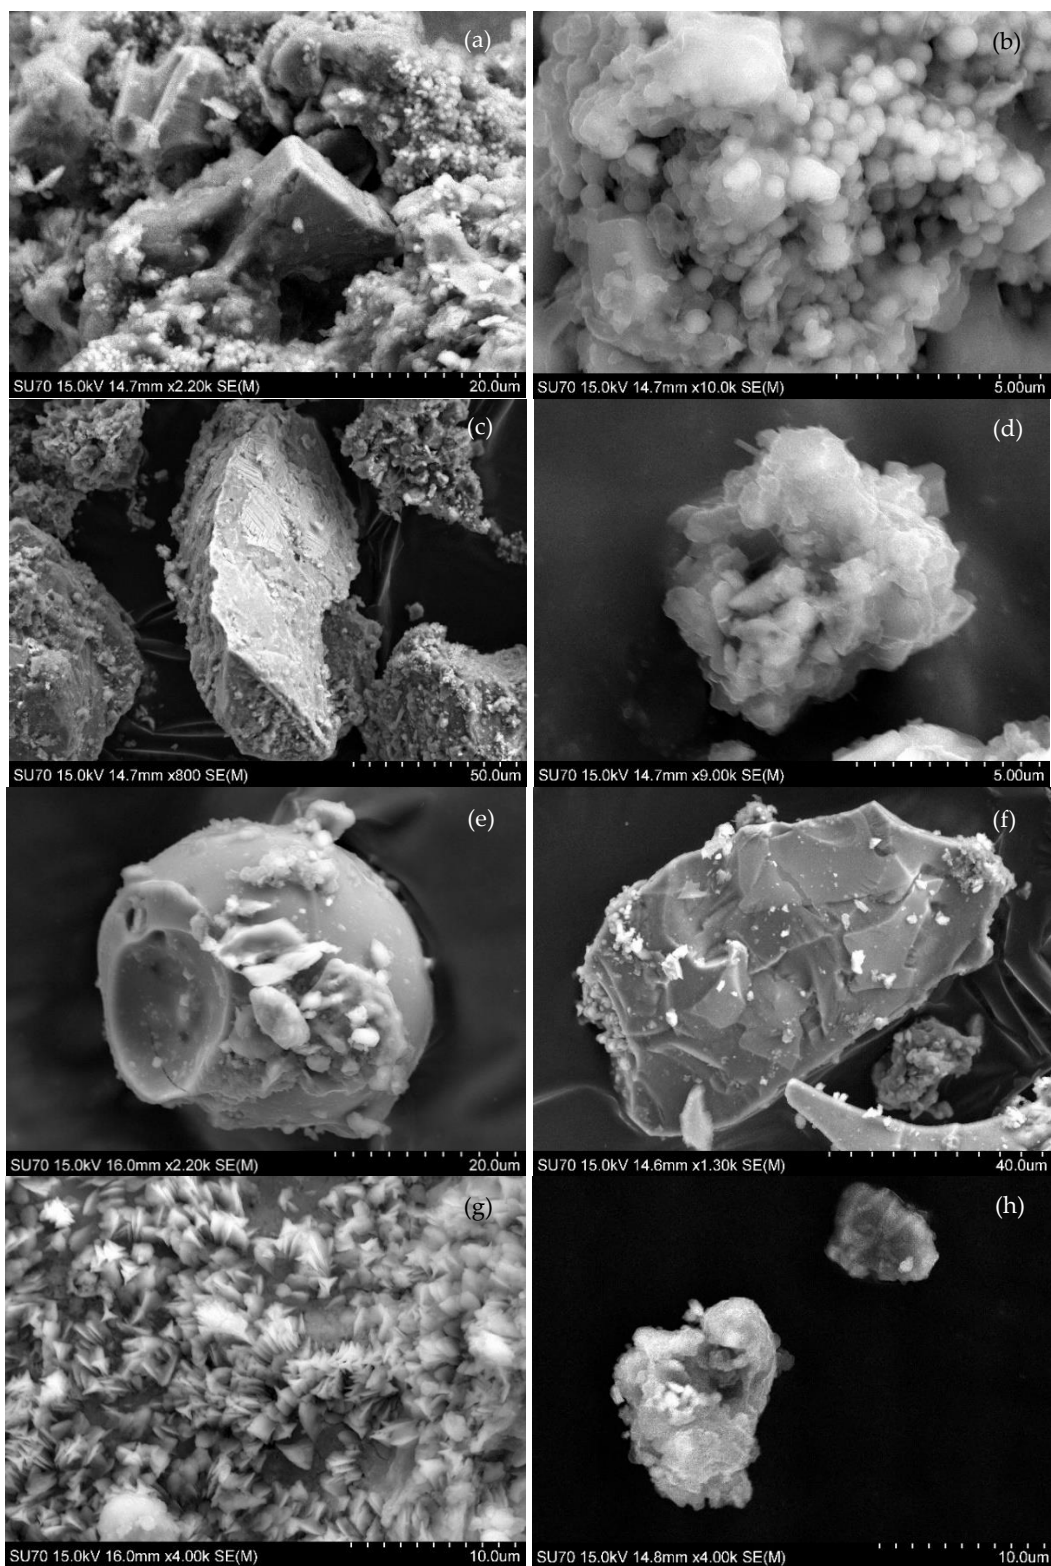

**Figure. S8.** SEM images of dust collected on the rooftops of private houses: (a) cubic particles of augite  $[(Ca,Na)(Mg,Fe,Al,Ti)(Si,Al)_2O_6]$  surrounded by small fluorite  $[CaF_2]$  particles; (b) detail of fluorite aggregate; (c) hematite  $[Fe_2O_3]$  with marks that suggest brittle fracture processes, covered with Ti oxides crystals; (d) particle aggregate with quartz and haüyne  $[(Na,Ca)_{4-8}Al_6Si_6(O,S)_{24}(SO_4,Cl)_{1-2}]$ ; (e) Fe oxide with vesicular marks; (f) sharp Fe and Ti rich particle with marks resulting from brittle fracture conditions characteristic of the eruption; (g) raft-like calcite aggregate; (h) rounded Fe and Ca enriched particles (Sahara dusts?).

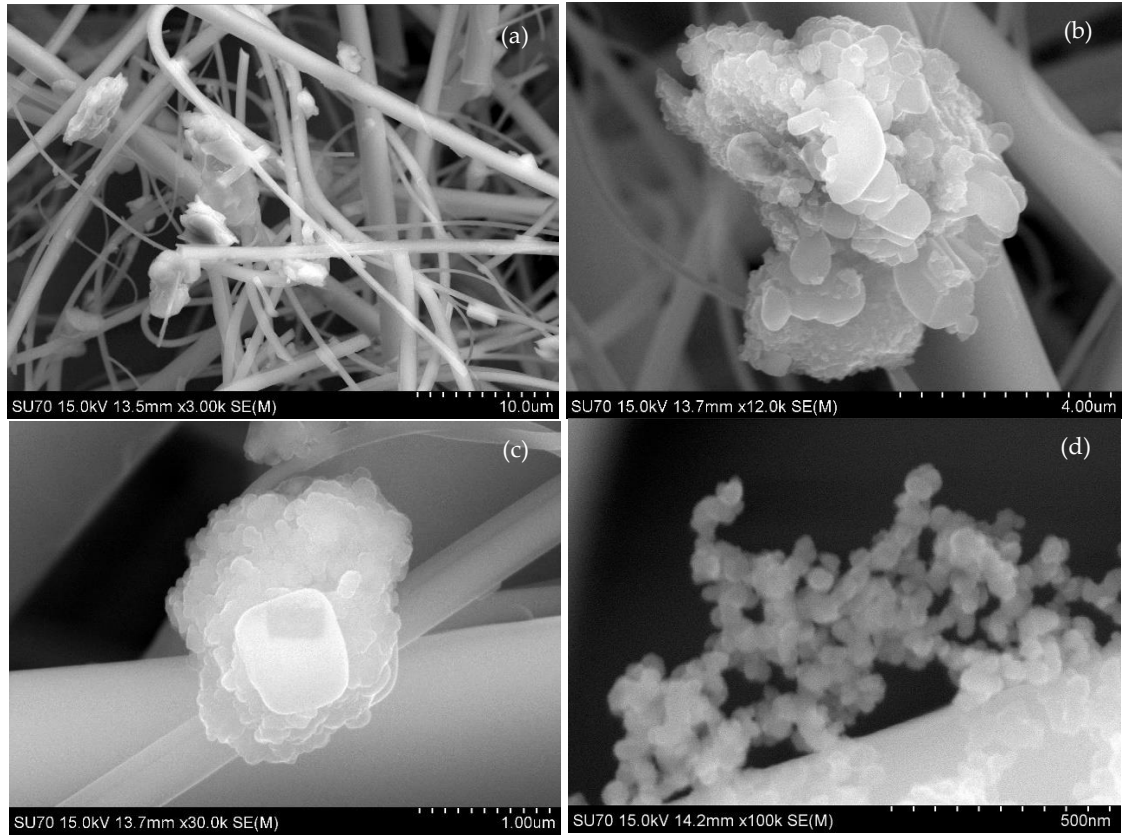

**Figure. S9.** SEM images of PM<sub>10</sub> collected on quartz filters: (a) PM<sub>10</sub> enriched in Fe, S and Ti; (b) Ca and S rich particles agglomerate (Bassanites?) with inhalable size; (c) salt [NaCl] on top of a Si, Fe, Ti enriched particle (Sahara?); (d) soot aggregate.

**Table S2.** Enrichment index (Ei), Geoaccumulation Index (Igeo), Enrichment Factor (EF), Contamination Factor (CF), Contamination Degree (CD), Pollution Load Index (PLI) and Potential Ecological Risk Index (PERI) for Al, Ca, Fe, K, Mg, Si, and Ti in outdoor dust samples sized < 63, 63-125 and 125-250  $\mu\text{m}$ .

|                          | $\varnothing < 63 \mu\text{m}$ |      |      | $\varnothing 63 - 125 \mu\text{m}$ |      |      | $\varnothing 125 - 250 \mu\text{m}$ |      |      |
|--------------------------|--------------------------------|------|------|------------------------------------|------|------|-------------------------------------|------|------|
|                          | mean                           | min  | max  | mean                               | min  | max  | mean                                | min  | max  |
| <b>Ei</b>                | 1.0                            | 1.0  | 1.1  | 1.2                                | 1.1  | 1.3  | 1.2                                 | 1.0  | 1.5  |
| <b>CD</b>                | 1.0                            | 1.0  | 1.1  | 1.2                                | 1.1  | 1.3  | 1.2                                 | 1.0  | 1.5  |
| <b>PLI</b>               | 1.0                            | 0.9  | 1.1  | 1.1                                | 1.0  | 1.2  | 1.1                                 | 0.9  | 1.1  |
| <b>PERI</b>              | 28                             | 27   | 29   | 32                                 | 30   | 34   | 34                                  | 30   | 44   |
| <b>Igeo<sub>Al</sub></b> | -0.4                           | -0.6 | -0.2 | -0.7                               | -1.1 | -0.5 | -0.7                                | -1.2 | -0.5 |
| <b>Igeo<sub>Ca</sub></b> | -0.3                           | -0.3 | -0.2 | -0.1                               | -0.3 | 0.1  | -0.2                                | -0.3 | 0.0  |
| <b>Igeo<sub>Fe</sub></b> | -0.2                           | -0.3 | -0.1 | 0.0                                | -0.2 | 0.1  | 0.0                                 | -0.3 | 0.4  |
| <b>Igeo<sub>K</sub></b>  | -0.8                           | -0.9 | -0.6 | -0.8                               | -1.7 | -0.4 | -1.2                                | -2.6 | -0.5 |
| <b>Igeo<sub>Mg</sub></b> | -0.1                           | -0.3 | 0.1  | 0.3                                | 0.2  | 0.7  | 0.4                                 | -0.5 | 0.9  |
| <b>Igeo<sub>Si</sub></b> | -0.7                           | -0.8 | -0.5 | -0.5                               | -0.6 | -0.3 | -0.5                                | -0.8 | -0.3 |
| <b>Igeo<sub>Ti</sub></b> | -0.4                           | -0.5 | -0.3 | -0.2                               | -0.3 | -0.1 | -0.1                                | -0.3 | 0.3  |
| <b>CF<sub>Al</sub></b>   | 1.0                            | 0.8  | 1.2  | 0.8                                | 0.3  | 1.0  | 0.7                                 | 0.5  | 0.9  |
| <b>CF<sub>Ca</sub></b>   | 1.1                            | 1.1  | 1.7  | 1.3                                | 1.1  | 1.6  | 1.2                                 | 1.1  | 1.5  |
| <b>CF<sub>Fe</sub></b>   | 1.3                            | 1.2  | 1.4  | 1.4                                | 1.3  | 1.7  | 1.5                                 | 1.2  | 2.3  |
| <b>CF<sub>K</sub></b>    | 0.7                            | 0.6  | 0.8  | 0.7                                | 1.8  | 3.7  | 0.5                                 | 0.1  | 0.9  |
| <b>CF<sub>Mg</sub></b>   | 1.4                            | 1.1  | 1.7  | 2.1                                | 1.8  | 3.1  | 2.5                                 | 0.9  | 3.7  |
| <b>CF<sub>Si</sub></b>   | 0.8                            | 0.7  | 0.9  | 0.9                                | 0.7  | 1.1  | 0.9                                 | 0.7  | 1.1  |
| <b>CF<sub>Ti</sub></b>   | 1.0                            | 0.9  | 1.1  | 1.2                                | 1.1  | 1.4  | 1.3                                 | 1.1  | 2.0  |

**Table S3** Enrichment index (Ei), Geoaccumulation Index (Igeo), Contamination Factor (CF), Contamination Degree (CD), Pollution Load Index (PLI) and Potential Ecological Risk Index (PERI) for As, Cd, Co, Cr, Cu, Mn, Ni, Pb, and Zn in outdoor dust samples, fractions < 63, 63-125 and 125-250  $\mu\text{m}$ .

|                          | $\varnothing < 63 \mu\text{m}$ |      |      | $\varnothing 63 - 125 \mu\text{m}$ |      |      | $\varnothing 125 - 250 \mu\text{m}$ |      |      |
|--------------------------|--------------------------------|------|------|------------------------------------|------|------|-------------------------------------|------|------|
|                          | mean                           | min  | max  | mean                               | min  | max  | mean                                | min  | max  |
| <b>Ei</b>                | 2.5                            | 2.2  | 2.6  | 2.1                                | 1.2  | 4.2  | 2.4                                 | 1.1  | 4.9  |
| <b>CD</b>                | 2.0                            | 1.8  | 2.3  | 1.7                                | 1.0  | 3.9  | 2.1                                 | 0.9  | 4.6  |
| <b>PLI</b>               | 2.2                            | 2.2  | 2.3  | 1.7                                | 1.1  | 2.8  | 1.6                                 | 1.0  | 2.3  |
| <b>PERI</b>              | 431                            | 414  | 448  | 273                                | 158  | 506  | 292                                 | 144  | 551  |
| <b>Igeo<sub>As</sub></b> | 1.1                            | 0.6  | 1.5  | -0.3                               | -0.4 | 0.8  | -0.3                                | -0.4 | 0.6  |
| <b>Igeo<sub>Cd</sub></b> | 0.9                            | 0.3  | 1.4  | 0.0                                | -0.5 | 1.3  | -0.3                                | -0.8 | 0.0  |
| <b>Igeo<sub>Co</sub></b> | -0.1                           | -0.1 | -0.1 | 0.0                                | -0.2 | 0.5  | 0.2                                 | -0.2 | 0.9  |
| <b>Igeo<sub>Cr</sub></b> | 0.3                            | 0.3  | 0.4  | 0.3                                | -0.9 | 2.0  | 0.5                                 | -2.0 | 2.4  |
| <b>Igeo<sub>Cu</sub></b> | 0.4                            | 0.4  | 0.5  | 0.3                                | 0.1  | 0.7  | 0.0                                 | -0.2 | 0.2  |
| <b>Igeo<sub>Mn</sub></b> | -0.4                           | -0.4 | -0.3 | -0.3                               | -0.4 | -0.3 | -0.4                                | -0.5 | -0.3 |
| <b>Igeo<sub>Ni</sub></b> | 0.8                            | 0.8  | 0.8  | 0.9                                | 0.3  | 2.4  | 1.3                                 | 0.1  | 2.5  |
| <b>Igeo<sub>Pb</sub></b> | 0.6                            | 0.4  | 0.8  | -0.1                               | -0.5 | 1.1  | -0.6                                | -1.3 | 0.2  |
| <b>Igeo<sub>Zn</sub></b> | -0.1                           | -0.2 | 0.1  | -0.1                               | -0.4 | 0.5  | -0.2                                | -0.4 | 0.2  |
| <b>CF<sub>As</sub></b>   | 3.9                            | 3.9  | 3.9  | 1.3                                | 1.0  | 3.4  | 1.2                                 | 1.0  | 2.7  |
| <b>CF<sub>Cd</sub></b>   | 4.2                            | 2.1  | 6.3  | 1.8                                | 0.9  | 5.7  | 1.1                                 | 0.7  | 1.5  |
| <b>CF<sub>Co</sub></b>   | 1.4                            | 1.4  | 1.4  | 1.6                                | 1.3  | 2.5  | 1.9                                 | 1.2  | 3.8  |
| <b>CF<sub>Cr</sub></b>   | 2.1                            | 2.0  | 2.2  | 3.0                                | 0.6  | 11.1 | 5.1                                 | 0.2  | 15.9 |
| <b>CF<sub>Cu</sub></b>   | 2.3                            | 2.2  | 2.5  | 2.1                                | 1.7  | 3.1  | 1.6                                 | 1.2  | 1.9  |
| <b>CF<sub>Mn</sub></b>   | 1.0                            | 1.0  | 1.1  | 1.1                                | 1.0  | 1.2  | 1.0                                 | 0.9  | 1.1  |
| <b>CF<sub>Ni</sub></b>   | 3.3                            | 3.3  | 3.4  | 5.0                                | 2.0  | 15.9 | 7.2                                 | 1.6  | 17.8 |
| <b>CF<sub>Pb</sub></b>   | 2.7                            | 2.2  | 3.2  | 1.7                                | 0.9  | 4.6  | 0.9                                 | 0.4  | 1.8  |
| <b>CF<sub>Zn</sub></b>   | 1.4                            | 1.2  | 1.7  | 1.5                                | 1.0  | 2.5  | 1.2                                 | 1.0  | 1.8  |
